# Supplementary material for: Incorporating Ce3+ into a high efficiency phosphor Ca2PO4Cl:Eu2+ and its luminescent properties
Source: Royal Society of Chemistry journal article supplement (doi:10.1039/c4ra03087g), 2014-01-01
Supplement: c4ra03087g1.pdf [file c4ra03087g1.pdf]

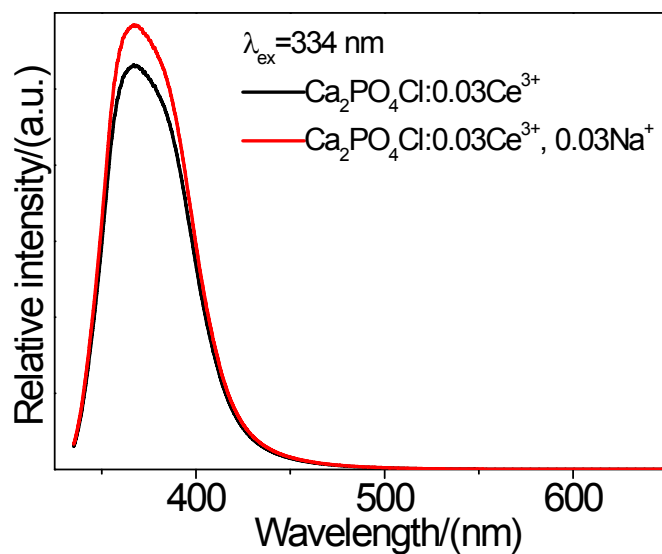

Fig.S1. Emission spectra of  $\text{Ca}_2\text{PO}_4\text{Cl}:0.03\text{Ce}^{3+}$ , and  $\text{Ca}_2\text{PO}_4\text{Cl}:0.03\text{Ce}^{3+}, 0.03\text{Na}^+$  ( $\lambda_{\text{ex}}=334 \text{ nm}$ ).

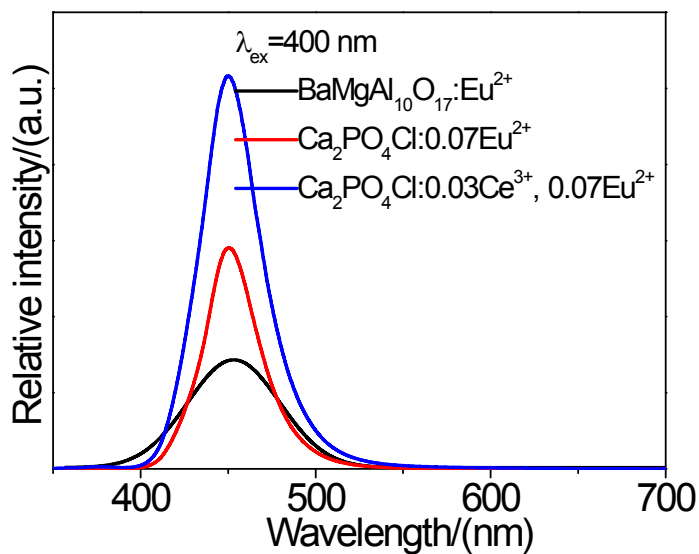

Fig.S2. Emission spectra of  $\text{Ca}_2\text{PO}_4\text{Cl}:0.07\text{Eu}^{2+}$ ,  $\text{Ca}_2\text{PO}_4\text{Cl}:0.03\text{Ce}^{3+}, 0.07\text{Eu}^{2+}$  and  $\text{BaMgAl}_{10}\text{O}_{17}:\text{Eu}^{2+}$  ( $\lambda_{\text{ex}}=400 \text{ nm}$ ).
